# Supplementary material for: High Throughput Measurement of γH2AX DSB Repair Kinetics in a Healthy Human Population
Source: PubMed Central journal article supplement (PMC4368624; doi:10.1371/journal.pone.0121083), 2015-03-20
Supplement: pone.0121083.s002.pdf [file pone.0121083.s002.pdf]

**S1\_Table:** Demographic details of the recruited donors for the study.

| <b>Variables</b>           | <b>Number</b> | <b>%</b> |
|----------------------------|---------------|----------|
| <b>Total population</b>    | 94            |          |
| <b>Age (years)</b>         |               |          |
| 21-30                      | 50            | 53.19    |
| 31-50                      | 44            | 46.8     |
| <b>Sex</b>                 |               |          |
| Male                       | 34            | 36.17    |
| Female                     | 60            | 63.82    |
| <b>Ethnicity</b>           |               |          |
| Hispanic                   | 38            | 40.42    |
| Non-Hispanic               | 56            | 59.57    |
| <b>Race</b>                |               |          |
| African American           | 17            | 18.08    |
| White                      | 35            | 37.23    |
| Asian                      | 13            | 13.82    |
| Other                      | 23            | 24.46    |
| Native                     | 3             | 3.19     |
| Mix                        | 3             | 3.19     |
| <b>Alcohol consumption</b> |               |          |
| Yes                        | 59            | 62.766   |
| Wine alone                 | 12            | 12.76    |
| Wine and others            | 47            | 50       |
| No                         | 35            | 37.23    |
