# Supplementary material for: High Throughput Measurement of γH2AX DSB Repair Kinetics in a Healthy Human Population
Source: PubMed Central journal article supplement (PMC4368624; doi:10.1371/journal.pone.0121083), 2015-03-20
Supplement: pone.0121083.s003.pdf [file pone.0121083.s003.pdf]

**S2\_Table:** Raw data for the  $\gamma$ -H2AX kinetics demographic study of the recruited donors for the time points 0 h, 0.5 h, 2 h, 4 h, 7 h and 24 h.

| Age | Gender | Race          | Ethnicity    | Alcohol consumption | 0 h   | 0.5 h  | 2 h    | 4 h    | 7 h   | 24 h  |
|-----|--------|---------------|--------------|---------------------|-------|--------|--------|--------|-------|-------|
| 26  | Female | White         | Non-Hispanic | Yes                 | 23.06 | 26.28  | 24.23  | 35.46  | 26.43 | 27.48 |
| 32  | Female | Others        | Hispanic     | Yes                 | 31.43 | 40.92  | 14.13  | 28.45  | 40.80 | 29.96 |
| 31  | Male   | Others        | Hispanic     | Yes                 | 12.99 | 33.89  | 38.09  | 52.98  | 28.30 | 44.22 |
| 25  | Male   | Afro-American | Non-Hispanic | Yes                 | 3.41  | 29.70  | 40.56  | 48.63  | 19.96 | 26.08 |
| 29  | Female | Afro-American | Non-Hispanic | Yes                 | 40.38 | 37.91  | 35.16  | 52.71  | 31.38 | 36.11 |
| 33  | Female | Asian         | Non-Hispanic | No                  | 25.47 | 32.83  | 38.46  | 56.32  | 40.17 | 41.10 |
| 26  | Male   | White         | Non-Hispanic | Yes                 | 14.34 | 32.56  | 40.64  | 47.46  | 25.60 | 25.08 |
| 31  | Female | White         | Non-Hispanic | Yes                 | 28.10 | 33.22  | 30.18  | 41.73  | 34.72 | 32.52 |
| 23  | Female | White         | Non-Hispanic | Yes                 | 15.15 | 38.56  | 34.87  | 39.30  | 37.12 | 34.24 |
| 26  | Male   | White         | Non-Hispanic | No                  | 11.55 | 26.32  | 26.30  | 67.55  | 46.15 | 39.49 |
| 30  | Male   | Asian         | Non-Hispanic | Yes                 | 11.60 | 15.21  | 39.15  | 61.73  | 37.09 | 26.94 |
| 25  | Male   | White         | Non-Hispanic | Yes                 | 15.55 | 30.03  | 40.30  | 36.68  | 25.43 | 21.44 |
| 45  | Female | Others        | Hispanic     | No                  | 25.49 | 24.71  | 22.56  | 32.26  | 36.26 | 21.40 |
| 28  | Male   | Afro-American | Non-Hispanic | Yes                 | 23.02 | 16.79  | 39.50  | 34.59  | 42.04 | 21.52 |
| 23  | Female | Asian         | Non-Hispanic | Yes                 | 19.68 | 34.58  | 41.28  | 41.73  | 31.79 | 29.66 |
| 26  | Male   | Asian         | Non-Hispanic | Yes                 | 19.62 | 18.47  | 41.68  | 43.64  | 44.07 | 37.03 |
| 26  | Female | Asian         | Non-Hispanic | Yes                 | 25.12 | 31.70  | 14.62  | 26.62  | 13.16 | 18.46 |
| 30  | Male   | White         | Non-Hispanic | No                  | 30.97 | 43.94  | 42.78  | 15.44  | 7.46  | 13.78 |
| 48  | Female | Others        | Hispanic     | No                  | 75.49 | 108.91 | 135.99 | 45.16  | 28.93 | 24.72 |
| 47  | Female | Others        | Hispanic     | No                  | 26.48 | 29.38  | 55.41  | 37.98  | 39.45 | 39.02 |
| 30  | Male   | White         | Non-Hispanic | Yes                 | 9.07  | 18.84  | 64.18  | 22.35  | 35.45 | 48.04 |
| 25  | Female | Others        | Hispanic     | No                  | 24.52 | 46.26  | 89.79  | 57.32  | 60.03 | 50.58 |
| 34  | Female | Others        | Hispanic     | No                  | 67.79 | 59.53  | 35.14  | 54.49  | 47.38 | 45.57 |
| 28  | Female | White         | Non-Hispanic | Yes                 | 35.75 | 38.85  | 124.46 | 52.76  | 53.80 | 44.44 |
| 22  | Female | Asian         | Non-Hispanic | No                  | 35.00 | 38.08  | 55.92  | 55.05  | 50.75 | 45.73 |
| 23  | Female | White         | Non-Hispanic | Yes                 | 42.63 | 46.80  | 57.55  | 52.52  | 33.38 | 65.33 |
| 35  | Female | Others        | Hispanic     | Yes                 | 40.01 | 62.75  | 101.85 | 51.07  | 47.73 | 45.13 |
| 29  | Female | White         | Non-Hispanic | Yes                 | 67.84 | 61.96  | 52.24  | 58.79  | 46.22 | 50.39 |
| 28  | Male   | Afro-American | Non-Hispanic | Yes                 | 52.35 | 97.16  | 104.64 | 69.38  | 34.50 | 40.05 |
| 36  | Female | White         | Non-Hispanic | No                  | 37.24 | 51.76  | 109.96 | 30.41  | 39.15 | 55.94 |
| 38  | Female | White         | Non-Hispanic | Yes                 | 33.18 | 61.11  | 56.97  | 57.54  | 27.41 | 34.07 |
| 27  | Male   | White         | Non-Hispanic | No                  | 53.75 | 74.28  | 90.59  | 82.73  | 83.81 | 54.35 |
| 22  | Female | Others        | Hispanic     | No                  | 21.08 | 86.93  | 53.57  | 42.17  | 36.11 | 42.05 |
| 31  | Female | Others        | Hispanic     | No                  | 57.64 | 98.68  | 101.24 | 86.72  | 68.78 | 57.99 |
| 42  | Female | Afro-American | Non-Hispanic | No                  | 46.89 | 86.40  | 67.71  | 61.64  | 47.71 | 20.59 |
| 41  | Female | Others        | Hispanic     | Yes                 | 45.21 | 97.40  | 87.29  | 80.32  | 33.16 | 16.91 |
| 50  | Female | Others        | Hispanic     | No                  | 65.61 | 144.22 | 120.33 | 102.77 | 46.32 | 26.02 |

|    |        |               |              |     |       |       |       |       |       |       |
|----|--------|---------------|--------------|-----|-------|-------|-------|-------|-------|-------|
| 43 | Female | Others        | Hispanic     | Yes | 3.33  | 28.78 | 2.37  | 3.45  | 4.25  | 3.65  |
| 25 | Female | Afro-American | Non-Hispanic | Yes | 3.47  | 16.73 | 1.79  | 2.31  | 14.64 | 1.10  |
| 30 | Female | Others        | Hispanic     | Yes | 4.36  | 17.93 | 2.57  | 4.46  | 3.44  | 4.07  |
| 44 | Female | Native        | Hispanic     | Yes | 3.35  | 13.85 | 3.65  | 3.69  | 32.07 | 20.08 |
| 40 | Female | Afro-American | Non-Hispanic | No  | 3.09  | 30.32 | 46.59 | 51.45 | 32.32 | 27.30 |
| 33 | Female | Afro-American | Non-Hispanic | Yes | 3.48  | 46.08 | 30.13 | 51.70 | 28.19 | 25.61 |
| 26 | Male   | Afro-American | Non-Hispanic | Yes | 3.94  | 52.41 | 27.76 | 61.48 | 43.38 | 35.42 |
| 31 | Female | Others        | Hispanic     | No  | 26.50 | 30.19 | 16.70 | 20.22 | 7.20  | 4.65  |
| 30 | Male   | White         | Non-Hispanic | Yes | 33.29 | 32.54 | 29.24 | 19.13 | 9.08  | 8.28  |
| 34 | Female | Afro-American | Hispanic     | Yes | 31.33 | 25.36 | 21.26 | 9.80  |       | 7.82  |
| 31 | Male   | White         | Hispanic     | No  | 18.27 | 19.43 | 31.47 | 10.38 | 7.94  | 8.83  |
| 46 | Male   | Native        | Hispanic     | No  | 9.12  | 8.91  | 35.11 | 10.98 | 19.14 | 14.90 |
| 50 | Female | Others        | Hispanic     | No  | 20.93 | 16.54 | 28.86 | 19.77 | 13.01 | 14.35 |
| 26 | Male   | White         | Hispanic     | Yes | 11.69 | 24.03 | 33.28 | 17.21 | 10.38 | 23.83 |
| 41 | Female | Others        | Hispanic     | No  | 6.19  | 10.13 | 11.85 | 6.16  | 5.94  | 0.99  |
| 31 | Female | White         | Hispanic     | Yes | 10.30 | 13.63 | 9.25  | 14.19 | 6.64  | 1.76  |
| 28 | Female | Afro-American | Hispanic     | Yes | 10.83 | 12.35 | 9.81  | 13.80 | 10.28 | 0.75  |
| 29 | Female | Others        | Hispanic     | No  | 14.10 | 1.14  | 12.47 | 13.93 | 21.06 | 9.62  |
| 46 | Male   | Afro-American | Hispanic     | Yes | 4.31  | 1.60  | 11.86 | 13.89 | 16.68 | 14.76 |
| 32 | Female | Others        | Hispanic     | No  | 8.97  | 9.62  | 9.79  | 8.34  | 19.08 | 14.36 |
| 37 | Female | Others        | Hispanic     | Yes | 9.10  | 15.95 | 9.82  | 13.24 | 17.22 | 7.25  |
| 23 | Male   | White         | Non-Hispanic | Yes | 23.35 | 26.19 | 33.13 | 39.22 | 17.52 | 19.94 |
| 24 | Female | White         | Non-Hispanic | No  | 12.72 | 18.21 | 18.45 | 42.85 | 9.01  | 17.02 |
| 26 | Female | White         | Non-Hispanic | Yes | 14.18 | 7.36  | 8.83  | 7.70  | 7.08  | 10.47 |
| 26 | Male   | White         | Non-Hispanic | Yes | 16.27 | 15.03 | 14.84 | 23.86 | 5.67  | 16.43 |
| 26 | Female | Afro-American | Hispanic     | No  | 14.03 | 21.54 | 22.37 | 22.97 | 12.81 | 10.97 |
| 24 | Male   | Mix           | Non-Hispanic | Yes | 7.64  | 25.82 | 23.67 | 25.96 | 8.44  | 9.90  |
| 27 | Female | White         | Non-Hispanic | Yes | 9.20  | 17.22 | 23.26 | 23.23 | 7.77  | 10.23 |
| 30 | Male   | Asian         | Non-Hispanic | No  | 21.99 | 22.54 | 21.11 | 16.32 | 17.14 | 22.68 |
| 27 | Male   | White         | Non-Hispanic | No  | 20.83 | 14.39 | 31.22 | 19.43 | 17.27 | 23.56 |
| 36 | Male   | Asian         | Non-Hispanic | No  | 22.96 | 30.72 | 19.70 | 42.69 | 21.94 | 27.36 |
| 23 | Male   | Afro-American | Non-Hispanic | Yes | 20.20 | 30.41 | 21.31 | 13.84 | 24.17 | 35.63 |
| 41 | Male   | Others        | Hispanic     | Yes | 13.13 | 17.67 | 8.75  | 16.61 | 12.53 | 4.49  |
| 26 | Male   | White         | Non-Hispanic | Yes | 10.95 | 16.43 | 15.33 | 16.93 | 5.94  | 7.50  |
| 31 | Female | Mix           | Non-Hispanic | Yes | 10.38 | 9.32  | 10.49 | 7.95  | 12.98 | 5.58  |
| 24 | Female | White         | Non-Hispanic | Yes | 13.35 | 10.70 | 9.66  | 5.91  | 13.35 | 8.64  |
| 24 | Female | White         | Non-Hispanic | Yes | 9.75  | 16.18 | 7.56  | 5.43  | 6.41  | 4.80  |
| 25 | Female | White         | Non-Hispanic | Yes | 23.81 | 6.81  | 6.86  | 8.55  | 15.34 | 20.52 |
| 24 | Male   | White         | Non-Hispanic | Yes | 12.81 | 4.36  | 3.29  | 3.74  | 12.96 | 14.61 |
| 23 | Male   | Asian         | Non-Hispanic | Yes | 16.04 | 9.39  | 4.85  | 3.87  | 14.80 | 8.02  |
| 23 | Female | White         | Non-Hispanic | Yes | 12.32 | 13.40 | 8.57  | 9.26  | 21.97 | 12.19 |

|    |      |               |              |     |       |       |       |      |       |      |
|----|------|---------------|--------------|-----|-------|-------|-------|------|-------|------|
| 42 | Male | Asian         | Non-Hispanic | Yes | 13.48 | 17.54 | 15.14 | 5.72 | 26.57 | 9.76 |
| 23 | Male | Mix           | Hispanic     | Yes | 7.99  | 7.85  | 12.53 | 5.28 | 6.73  | 5.31 |
| 32 | Male | Afro-American | Hispanic     | Yes | 9.40  | 12.98 | 9.74  | 9.56 | 11.79 | 7.90 |
