# Supplementary material for: High Throughput Measurement of γH2AX DSB Repair Kinetics in a Healthy Human Population
Source: PubMed Central journal article supplement (PMC4368624; doi:10.1371/journal.pone.0121083), 2015-03-20
Supplement: pone.0121083.s004.pdf [file pone.0121083.s004.pdf]

**S3\_Table:**  $\gamma$ H2AX data values are presented as Mean  $\pm$  SEM at time points of 0 h, 0.5 h and 24 h for each of the demographic groups.

| <b>Variables</b>      | <b>Groups</b> | <b>Baseline (0 h)<br/><math>\gamma</math>H2AX</b> | <b>Radiation<br/>induced (0.5 h)<br/><math>\gamma</math>H2AX</b> | <b>Residual (24 h)<br/><math>\gamma</math>H2AX</b> |
|-----------------------|---------------|---------------------------------------------------|------------------------------------------------------------------|----------------------------------------------------|
| <b>Age (Years)</b>    | 20-30         | 20.09 $\pm$ 2.01                                  | 28.34 $\pm$ 2.95                                                 | 24.25 $\pm$ 2.32                                   |
|                       | 31-50         | 24.9 $\pm$ 3.41                                   | 38.95 $\pm$ 5.73                                                 | 22.25 $\pm$ 2.72                                   |
| <b>Gender</b>         | Female        | 25.21 $\pm$ 2.67                                  | 37.32 $\pm$ 4.32                                                 | 24.06 $\pm$ 2.48                                   |
|                       | Male          | 17.37 $\pm$ 2.07                                  | 25.856 $\pm$ 3.42                                                | 22.41 $\pm$ 2.38                                   |
| <b>Race</b>           | Others        | 28.58 $\pm$ 4.80                                  | 46.73 $\pm$ 8.53                                                 | 24.14 $\pm$ 3.96                                   |
|                       | White         | 22.37 $\pm$ 2.59                                  | 28.01 $\pm$ 3.22                                                 | 25.17 $\pm$ 3.13                                   |
|                       | Afro American | 18 $\pm$ 4.42                                     | 34.51 $\pm$ 6.92                                                 | 20.77 $\pm$ 3.37                                   |
|                       | Asian         | 21.09 $\pm$ 2.13                                  | 25.1 $\pm$ 3.06                                                  | 26.6 $\pm$ 3.95                                    |
| <b>Ethnicity</b>      | Hispanic      | 22.84 $\pm$ 3.52                                  | 35.255 $\pm$ 6.23                                                | 19.497 $\pm$ 2.91                                  |
|                       | NonHispanic   | 21.636 $\pm$ 2.05                                 | 30.886 $\pm$ 2.849                                               | 25.968 $\pm$ 2.15                                  |
| <b>Alcohol status</b> | Alcohol       | 18.61 $\pm$ 1.915                                 | 27.74 $\pm$ 2.77                                                 | 21.15 $\pm$ 2.08                                   |
|                       | No-alcohol    | 28.73 $\pm$ 3.69                                  | 42.35 $\pm$ 6.59                                                 | 27.67 $\pm$ 3.13                                   |
