# Supplementary material for: High Throughput Measurement of γH2AX DSB Repair Kinetics in a Healthy Human Population
Source: PubMed Central journal article supplement (PMC4368624; doi:10.1371/journal.pone.0121083), 2015-03-20
Supplement: pone.0121083.s005.pdf [file pone.0121083.s005.pdf]

**S4\_Table:** The effect of age, ethnicity, race and alcohol use on variation in DSB  $\gamma$ H2AX repair kinetics at 0 h, 0.5 h and 24 h by A. Multiple linear regression analysis B. Simple linear regression analysis for parameters that were significant with multiple regression analysis is presented. Significant  $P < 0.05$ .

**A. Multiple linear regression analysis**

| Time point | R     | Rsqr   | Adj Rsqr | Variables with significant P value |                            |                          |
|------------|-------|--------|----------|------------------------------------|----------------------------|--------------------------|
| 0 h        | 0.444 | 0.197  | 0.144    | Race<br>( $P=0.027$ )              | Ethnicity<br>( $P=0.063$ ) | Alcohol<br>( $P=0.047$ ) |
| 0.5 h      | 0.250 | 0.0625 | 0.00005  | None                               |                            |                          |
| 24 h       | 0.362 | 0.131  | 0.0732   | Age<br>( $P=0.046$ )               |                            |                          |

**B. Simple linear regression analysis**

| Time point | R     | Rsqr   | Adj Rsqr | Variables with significant P value |
|------------|-------|--------|----------|------------------------------------|
| 0 h        | 0.281 | 0.0790 | 0.0674   | Race ( $P=0.011$ )                 |
|            | 0.290 | 0.0842 | 0.0726   | Alcohol ( $P=0.009$ )              |
| 0.5 h      | None  |        |          |                                    |
| 24 h       | 0.314 | 0.0989 | 0.0875   | Age ( $P=0.004$ )                  |
